# Supplementary material for: Return of intracranial beta oscillations and traveling waves with recovery from traumatic brain injury
Source: PubMed Central journal article supplement — bioRxiv. 2024 Jul 23:2024.07.19.604293. Preprint. [Version 1] doi: 10.1101/2024.07.19.604293 (PMC11291083; doi:10.1101/2024.07.19.604293), 2024-07-23
Supplement: NIHPP2024.07.19.604293V1-supplement-1.pdf [file NIHPP2024.07.19.604293V1-supplement-1.pdf]

## Supplementary

Figure S1

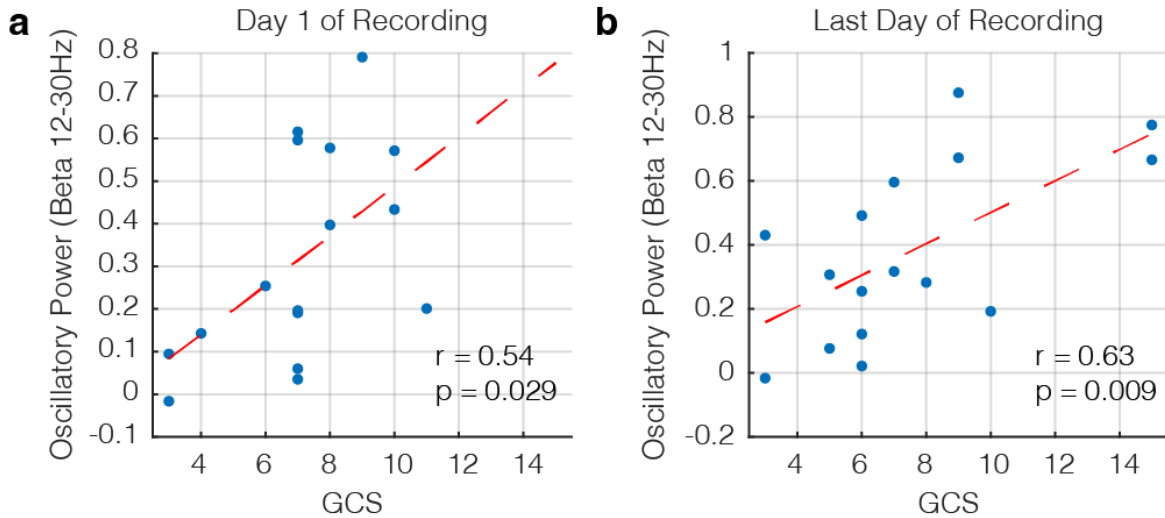

**Relationship between beta oscillatory power and GCS is the same regardless of the recording day of interest.** a) Scatter plot showing the correlation between beta oscillatory power and GCS for the first day of recording ( $r = 0.54$ ,  $p = 0.029$ ). Each dot represents the average values for one patient, and the red dashed line shows the line of best fit. b) Scatter plot showing the correlation for the last day of recording (ie. the last day before hardware was removed;  $r = 0.63$ ,  $p = 0.009$ ).

## Figure S2

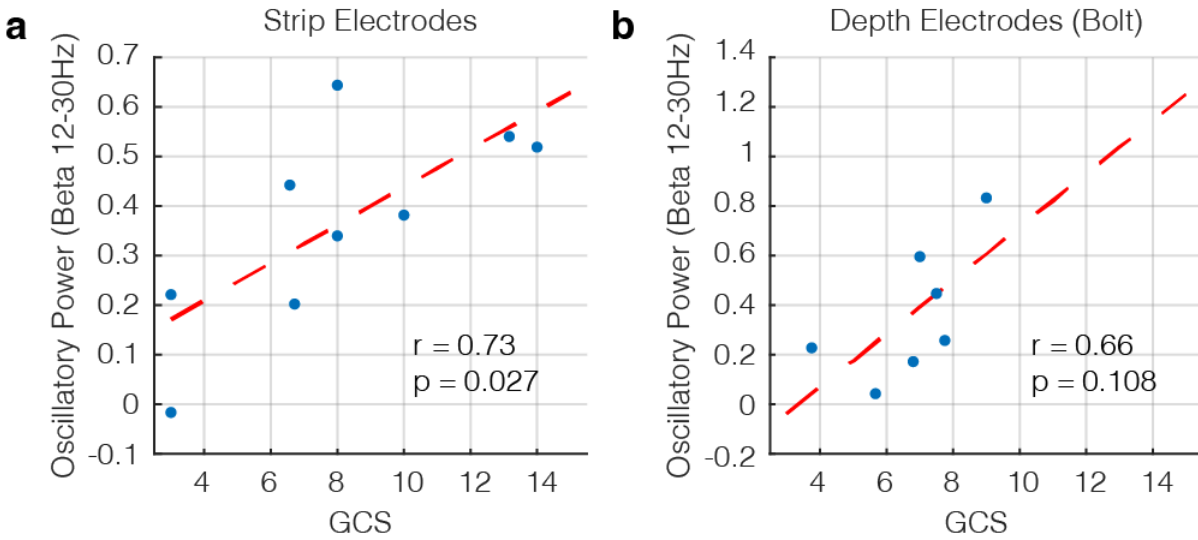

**Replication of main results separately using strip or depth electrodes.** a) Scatter plot showing the correlation between beta oscillatory power and GCS for patients implanted with strip electrodes after craniotomy for evacuation of acute subdural hematoma ( $n = 9$ ;  $r = 0.73$ ,  $p = 0.027$ ). Each dot represents the average values for one patient, and the red dashed line shows the line of best fit. b) Scatter plot showing the correlation for patients implanted with depth electrodes via quad-lumen intracranial bolts after blunt TBI ( $n = 7$ ;  $r = 0.66$ ,  $p = 0.108$ ). We note here that the overall correlation is not significant ( $p > 0.05$ ), but clearly trending towards significance.

## Figure S3

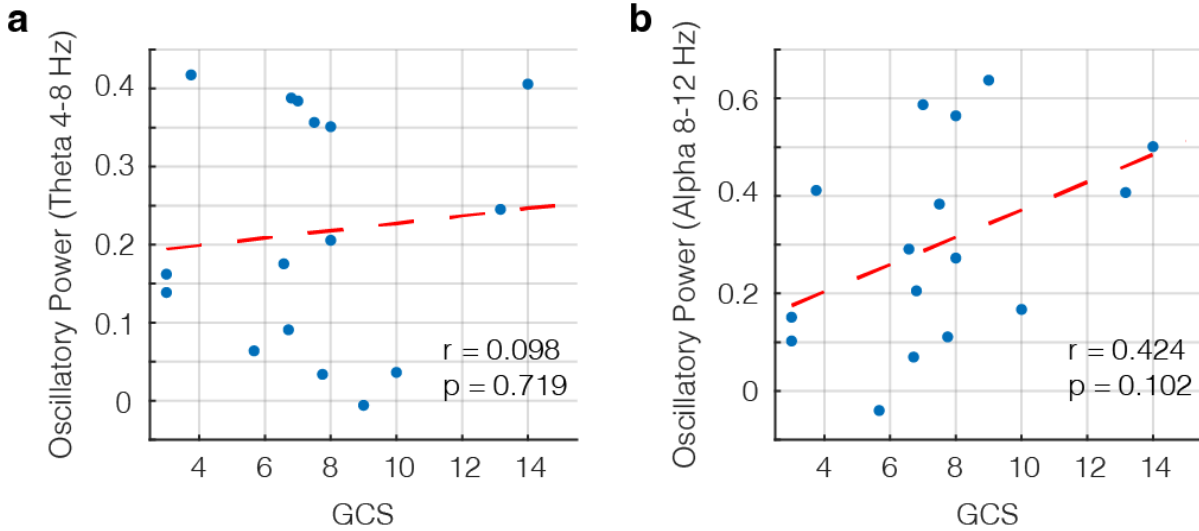

**Correlation between GCS and oscillatory power is not observed in the theta or alpha frequency bands.**

a) Scatter plot showing the correlation between theta (4-8 Hz) oscillatory power and GCS ( $r = 0.098$ ,  $p = 0.719$ ). Each dot represents the average values for one patient, and the red dashed line shows the line of best fit. b) Scatter plot showing the correlation between alpha (8-12 Hz) oscillatory power and GCS ( $r = 0.424$ ,  $p = 0.102$ ).

## Figure S4

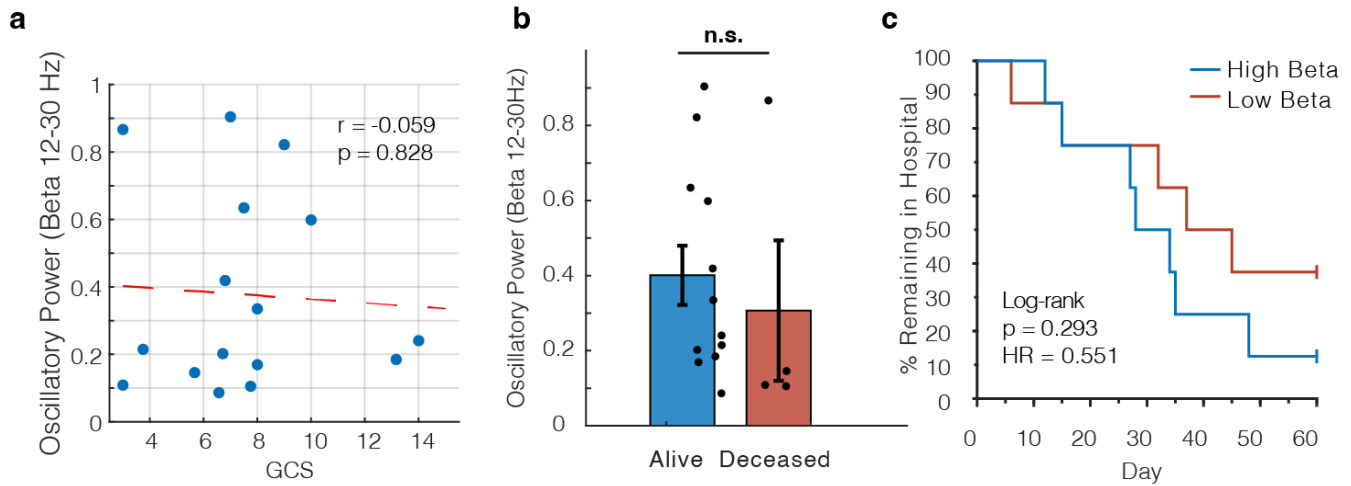

**Scalp EEG beta oscillatory power does not significantly correlate with GCS or predict mortality or length of in-hospital stay.** a) Scatter plot showing correlation between beta oscillatory power and GCS ( $r = -0.059$ ,  $p = 0.828$ ). Each dot represents the average values for one patient, and the red dashed line shows the line of best fit. b) Comparison of average beta oscillatory power for patients who survived their TBI versus those who died within 2 months of injury ( $p > 0.05$ ). c) Kaplan-Meier curve showing % of patients remaining in the hospital where patients were split into two groups based on the median beta oscillatory power (log-rank test,  $p = 0.293$ ).

## Figure S5

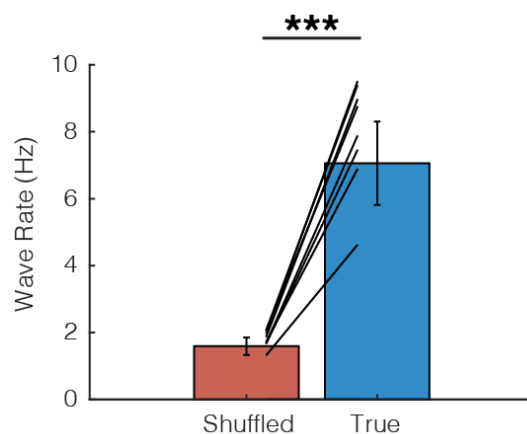

**Control analysis comparing true wave detection rate versus chance.** Shuffled distributions were generated by randomizing phase values in time and recalculating the wave detection as in the true case. In all patients (except in one patient where no waves were detected in either case), wave rate was higher in the true data than in the shuffled distribution, indicating that our wave detection methodology detects genuine oscillatory phenomena ( $t(8) = 6.74$ ,  $p < 0.001$ ).

## Figure S6

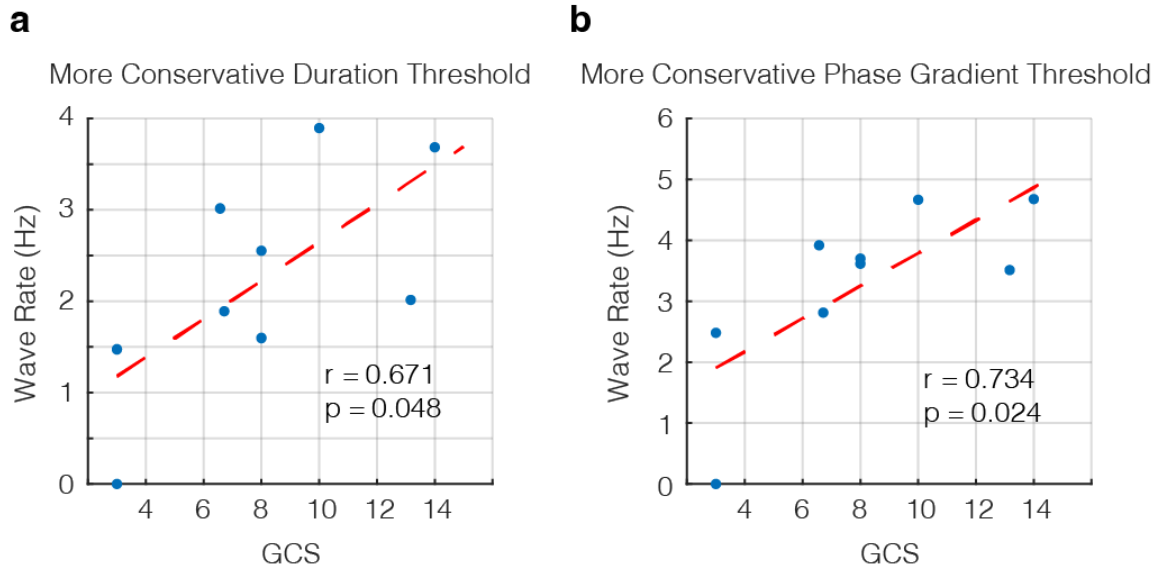

**Replication of wave rate results with more conservative detection thresholds.** a) Correlation between wave rate and GCS with wave detection threshold increased to 8 time points (31.25 ms, roughly equivalent to one cycle at 30Hz;  $r = 0.671$ ,  $p = 0.048$ ). Each dot represents the average values for one patient, and the red dashed line shows the line of best fit. b) Correlation between wave rate and GCS with wave detection threshold increased to  $|Z| > 1.5$  ( $r = 0.734$ ,  $p = 0.024$ ).

## Figure S7

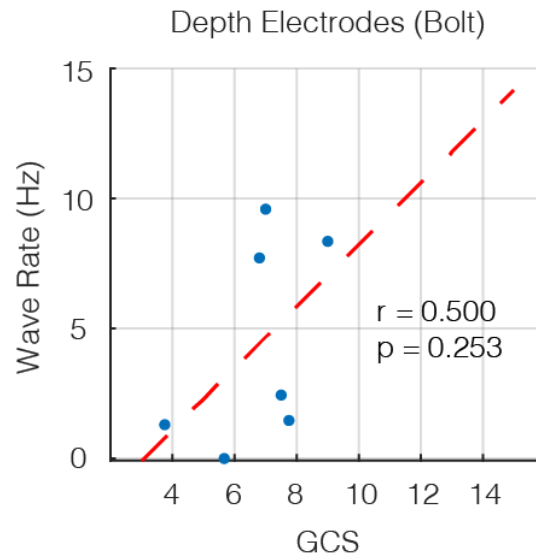

**Wave rate and GCS are not significantly correlated in patients implanted with depth electrodes via quad-lumen intracranial bolts.** Each dot represents the average values for one patient, and the red dashed line shows the line of best fit ( $r = 0.500$ ,  $p = 0.253$ ). We infer that the lack of significant correlation is due to the difficulty in detecting traveling cortical waves along the course of depth electrodes that are inserted deep within the parenchyma.

## Figure S8

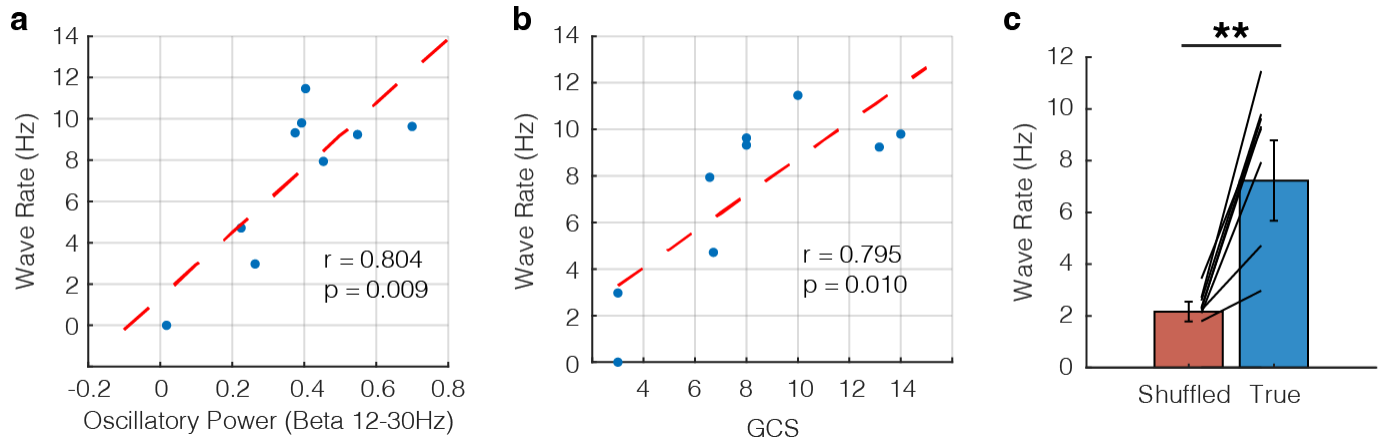

**Replication of wave rate results with phase gradient consistency.** a) Correlation between wave rate and beta oscillatory power as detected with phase gradient consistency ( $r = 0.804$ ,  $p = 0.009$ ). Each dot represents the average values for one patient, and the red dashed line shows the line of best fit. b) Correlation between wave rate and GCS ( $r = 0.785$ ,  $p = 0.010$ ). c) Control analysis comparing true wave detection rate versus chance (as obtained by randomizing phase values in time). In all patients (except in one patient where no waves were detected in either case), wave rate was higher in the true data than in the shuffled distribution ( $t(8) = 4.94$ ,  $p = 0.001$ ).



Table S1

| Patient | Age | Gender | Mechanism  | Diagnosis   | Surgery / Device                                                                          | In Hospital Mortality                                   |
|---------|-----|--------|------------|-------------|-------------------------------------------------------------------------------------------|---------------------------------------------------------|
| 1       | 71  | M      | Found down | mICH        | R frontal bolt, EVD                                                                       | Yes<br>Comfort care →<br>Palliative<br>Extubation Day 6 |
| 2       | 85  | F      | MVC        | SDH         | R craniotomy, subdural strip electrode                                                    | No<br>Discharged<br>POD15<br>GCS15                      |
| 3       | 58  | M      | Fall       | mICH        | R frontal bolt                                                                            | Yes<br>Comfort care →<br>Palliative<br>extubation Day 5 |
| 4       | 30  | M      | GSW        | mICH        | Bifrontal craniectomy, EVD, subdural strip electrode                                      | No<br>Discharged<br>POD34<br>GCS15                      |
| 5       | 69  | M      | Fall       | mICH        | R craniotomy, Revision R craniotomy POD3 with strip electrode, bilateral MMA embolization | No<br>Discharged<br>POD12<br>GCS15                      |
| 6       | 58  | M      | Found down | R SDH       | R craniotomy, subdural strip electrode, L frontal bolt                                    | No<br>Discharged<br>POD28<br>GCS15                      |
| 7       | 30  | M      | Fall       | L SDH / EDH | L craniotomy, R frontal bolt                                                              | No<br>Discharged<br>POD35<br>GCS15                      |
| 8       | 68  | M      | Fall       | mICH        | R craniotomy, subdural strip electrode                                                    | No<br>Discharged<br>POD45<br>GCS14                      |
| 9       | 59  | M      | Fall       | L SDH       | L craniotomy, subdural strip electrode                                                    | Yes<br>Comfort care<br>→ Palliative<br>extubation Day 2 |
| 10      | 65  | M      | MVC        | mICH        | L craniotomy, R frontal bolt, R frontal EVD                                               | No<br>Discharged<br>hospital day 32<br>GCS14            |

|    |    |   |      |                |                                                                    |                                              |
|----|----|---|------|----------------|--------------------------------------------------------------------|----------------------------------------------|
| 11 | 33 | F | MVC  | mICH           | R frontal bolt                                                     | No<br>Discharged<br>hospital day 27<br>GCS15 |
| 12 | 53 | M | Fall | L SDH          | L craniotomy, subdural<br>strip electrode                          | Yes<br>Comfort care<br>POD2                  |
| 13 | 28 | M | GSW  | mICH           | R craniotomy, subdural<br>strip electrode, later L<br>frontal bolt | No<br>Discharged<br>POD37                    |
| 14 | 33 | M | GSW  | mICH           | L craniotomy, R frontal<br>bolt                                    | No<br>Discharged<br>POD48                    |
| 15 | 74 | F | Fall | L SDH          | L craniotomy, subdural<br>strip electrode                          | No<br>Discharged<br>POD6                     |
| 16 | 27 | F | MVC  | L SDH /<br>EDH | L skull fracture elevation,<br>R frontal bolt                      | No<br>Discharged<br>POD15<br>GCS15           |

SDH - Subdural hematoma

EDH - Epidural hematoma

mICH - Multicompartmental intracranial hemorrhage

MVC - Motor vehicle collision

GSW - Gunshot wound

EVD - External ventricular drain
